# Supplementary material
Source: Research Square preprint supplement (doi:10.21203/rs.3.rs-9503264/v1)
Supplement: Supplementary file 2 [file 4feb3228b940c17834d34881.docx]

Supplement

Supplement 1: Results of the farmer survey.

To provide useful frost-related information for users, a survey was conducted in 2023 among farmers in Kaminoyama City, Yamagata Prefecture. A total of 28 responses were collected. Kaminoyama City is known for fruit cultivation and experienced significant late frost damage in 2021. The survey is outlined as follows:

Question (a):

How do you perceive the frequency of JMA frost advisories?

Answer:

① So much

② Much

③ Appropriate

④ Little

⑤ So little

⑥ Other

Question (b):

If you answered ‘So much’ or ’Much’ in Question (a), please respond to the following: Why do you think JMA frost advisories are issued too frequently? (multiple answers allowed)

Answer:

① Air temperature does not decrease because wind conditions are not calm.

② Air temperature does not decrease because weather conditions are cloudy or rain.

③ Frost does not occur even when air temperature decreases.

④ Other

Question (c):

In addition to frost information, are predicted leaf and bud temperatures useful as direct indicators of frost damage?

① Very useful

② Useful

③ Useless

**
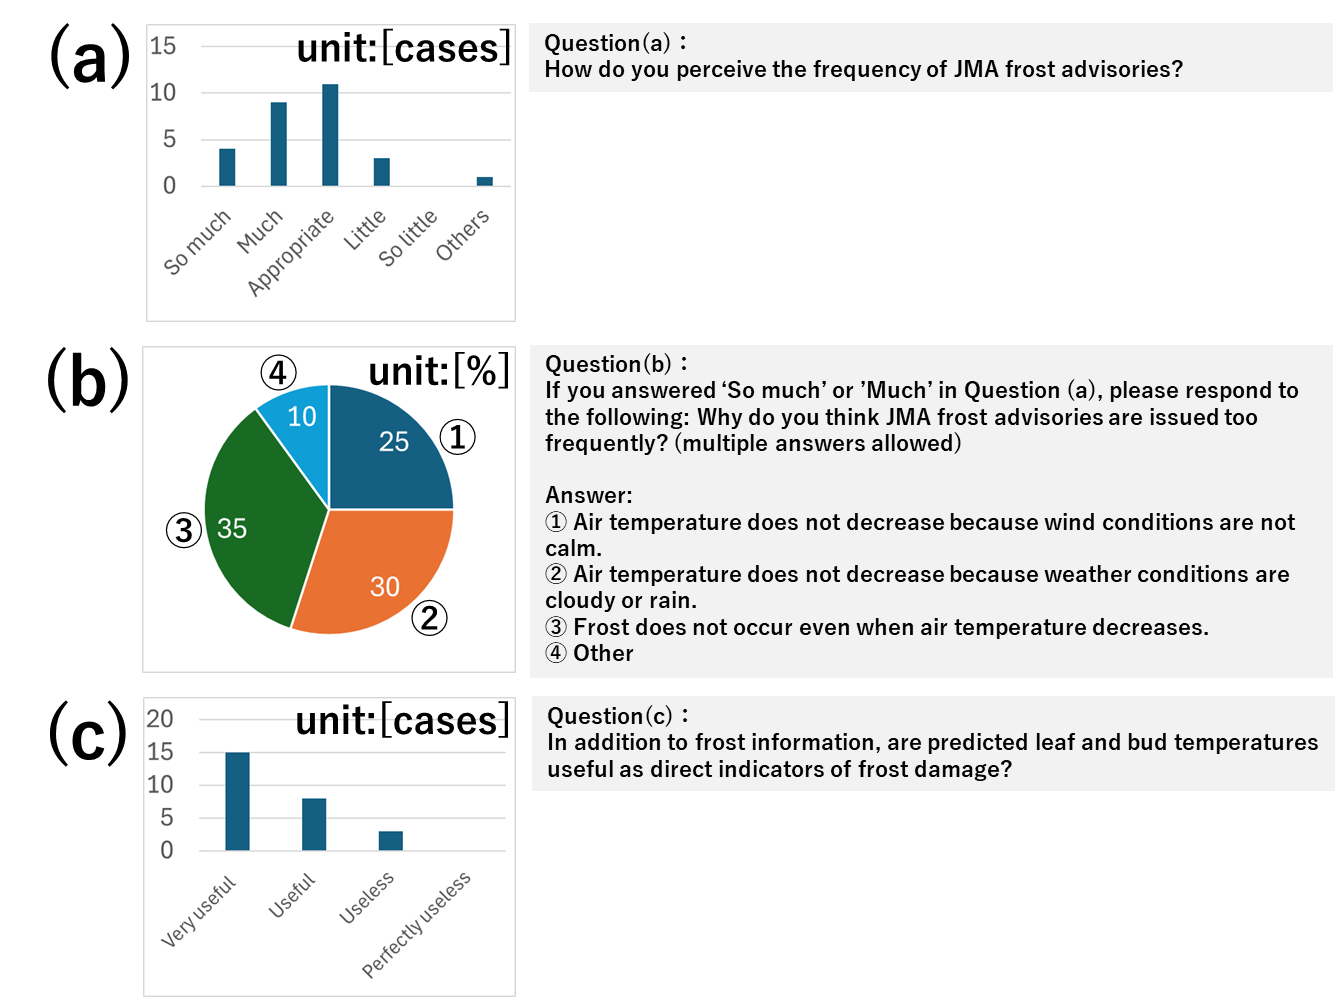
**④ Perfectly useless

**Fig. S1**. Results of the farmer survey.
