# Supplementary material
Source: Research Square preprint supplement (doi:10.21203/rs.3.rs-9503264/v1)

Tables

**
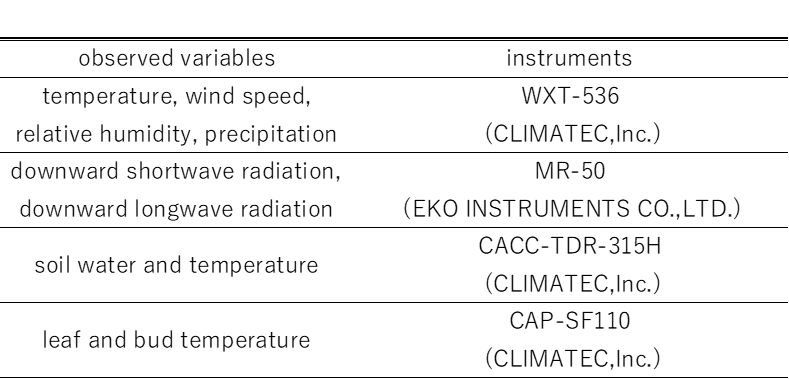
Table 1** List of observed variables and the instruments used.

Supplement: Supplementary file 1 [file 0ba3ea017bf18a8cf7505695.docx]
